# Supplementary material for: The CsHSP17.2 molecular chaperone is essential for thermotolerance in Camellia sinensis
Source: PubMed Central journal article supplement (PMC5430664; doi:10.1038/s41598-017-01407-x), 2017-04-27
Supplement: 41598_2017_1407_MOESM1_ESM.pdf [file 41598_2017_1407_MOESM1_ESM.pdf]

**The CsHSP17.2 molecular chaperone is essential for thermotolerance  
in *Camellia sinensis***

Mingle Wang<sup>1</sup>, Zhongwei Zou<sup>2</sup>, Qinghui Li<sup>1</sup>, Kang Sun<sup>1</sup>, Xuan Chen<sup>1</sup> & Xinghui Li<sup>1,\*</sup>

<sup>1</sup>Tea Research Institute, Nanjing Agricultural University, Nanjing, Jiangsu Province, P.  
R. China

<sup>2</sup>Department of Plant Science, University of Manitoba, Winnipeg, Manitoba, Canada

\* Correspondence: Dr. Xinghui Li

Tea Research Institute, Nanjing Agricultural University, Weigang No. 1, Nanjing,  
Jiangsu Province, P. R. China

Tel: +86 25 8439 5182

Fax: +86 25 8439 5182

E-mail: [lxh@njau.edu.cn](mailto:lxh@njau.edu.cn)

## Supplementary Information

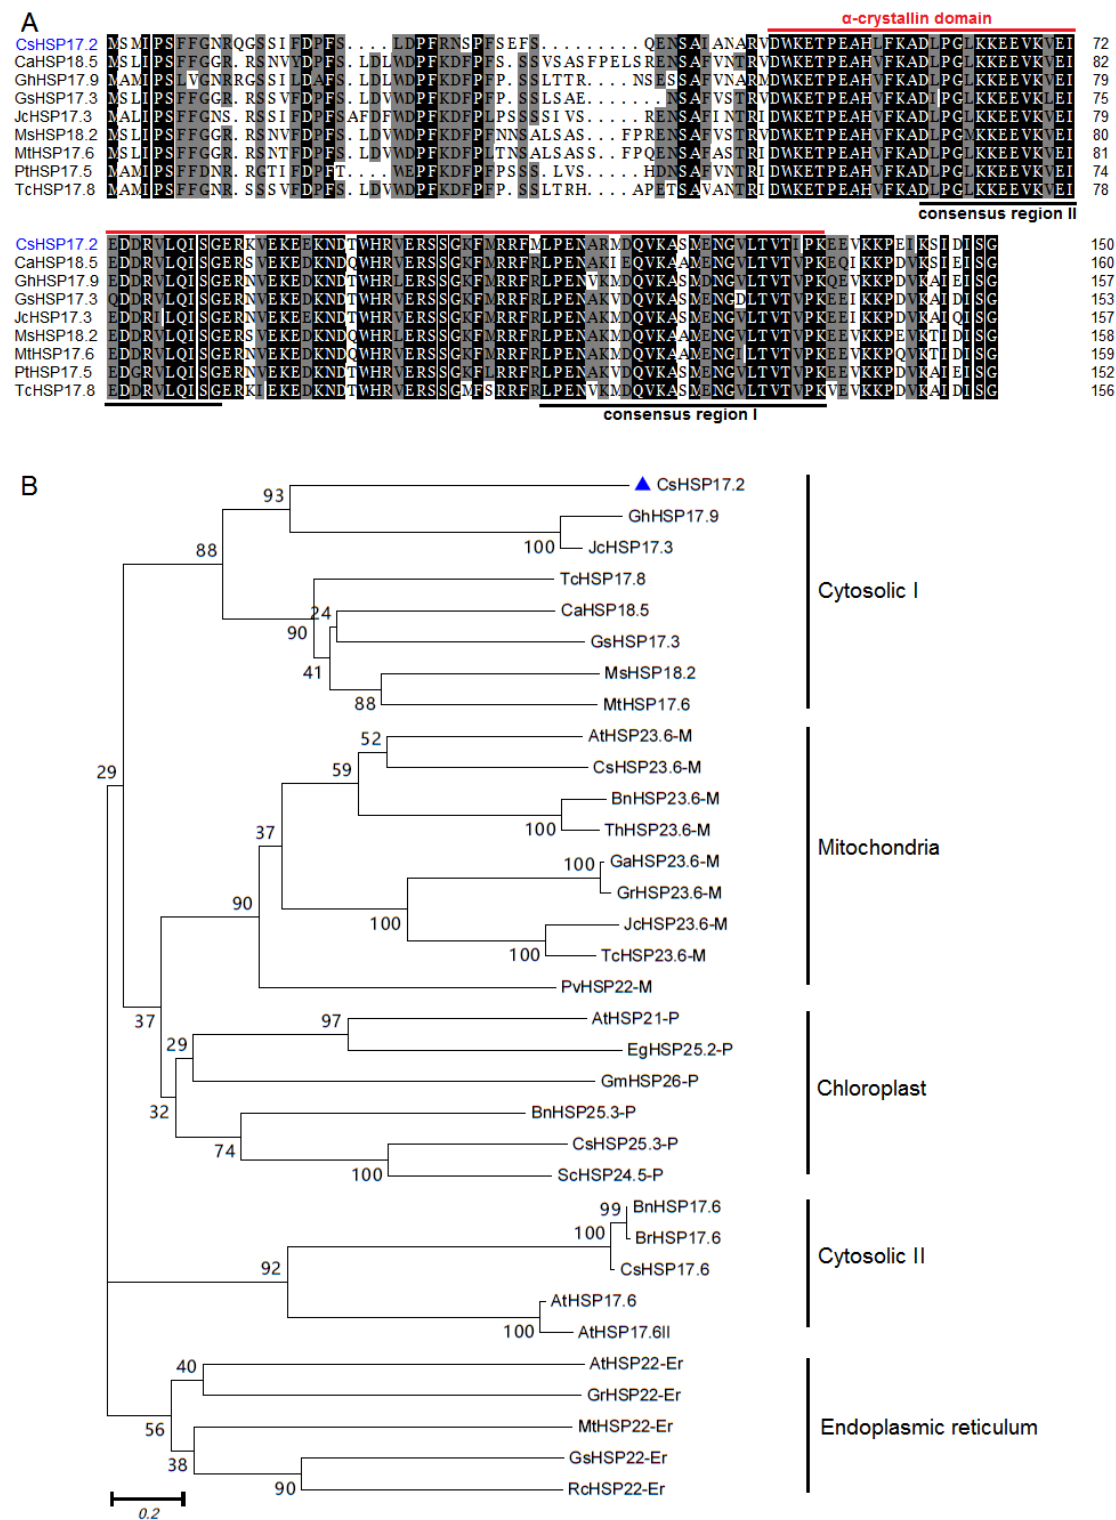

**Figure S1. Characterization of CsHSP17.2 protein.** (a) Comparison of the deduced protein sequences of CsHSP17.2 with other plant sHSPs. The  $\alpha$ -crystallin domain and two consensus regions are highlighted by red and black lines, respectively. (b) Phylogenetic analysis of the relationship between CsHSP17.2 and sHSPs from other plant species. The Neighbor-Joining

method was used with the following parameters: bootstrap (1 000 replicates), poisson correction and complete deletion. The genetic distances are indicated by the horizontal bar. The amino acid sequences are shown as follows: AtHSP21-P (AAA32818), AtHSP17.6 (NP\_196763), AtHSP17.6II (BAC43441), AtHSP22-Er (NP\_192763), and AtHSP23.6-M (NP\_194250), *Arabidopsis thaliana*; BnHSP25.3-P (XP\_013698943), BnHSP17.6 (XP\_013712624), and BnHSP23.6-M (XP\_013740237), *Brassica napus*; BrHSP17.6 (XP\_009125845), *Brassica rapa*; CaHSP18.5 (XP\_004505085) and CaHSP22.7-Er (XP\_004495437), *Cicer arietinum*; CsHSP25.3-P (XP\_010438568), CsHSP17.6 (XP\_010453267), and CsHSP23.6-M (XP\_010448463), *Camelina sativa*; CsHSP17.2 (KU244518), *Camellia sinensis*; EgHSP25.2-P (XP\_010035308), *Eucalyptus grandis*; GaHSP23.6-M (KHG21474), *Gossypium arboreum*; GhHSP17.9 (AEH30706), *Gossypium hirsutum*; GmHSP26-P (XP\_003523325), *Glycine max*; GrHSP22-Er (XP\_012462416) and GrHSP23.6-M (XP\_012439144), *Gossypium raimondii*; GsHSP17.3 (KHN46262) and GsHSP22-Er (KHN30529), *Glycine soja*; JcHSP17.3 (XP\_012066921) and JcHSP23.6-M (XP\_012090444), *Jatropha curcas*; MsHSP18.2 (P27880), *Medicago sativa*; MtHSP17.6 (XP\_003619703) and MtHSP22-Er (XP\_013468797), *Medicago truncatula*; PtHSP17.5 (XP\_002325979), *Populus trichocarpa*; PvHSP22-M (AHA84250), *Phaseolus vulgaris*; RcHSP22-Er (XP\_015575066), *Ricinus communis*; ScHSP24.5-P (ABD66589), *Senecio crataegifolius*; TcHSP17.8 (XP\_007016257) and TcHSP23.6-M (XP\_007038384), *Theobroma cacao*; ThHSP23.6-M (XP\_010532236), *Tarenaya hassleriana*.

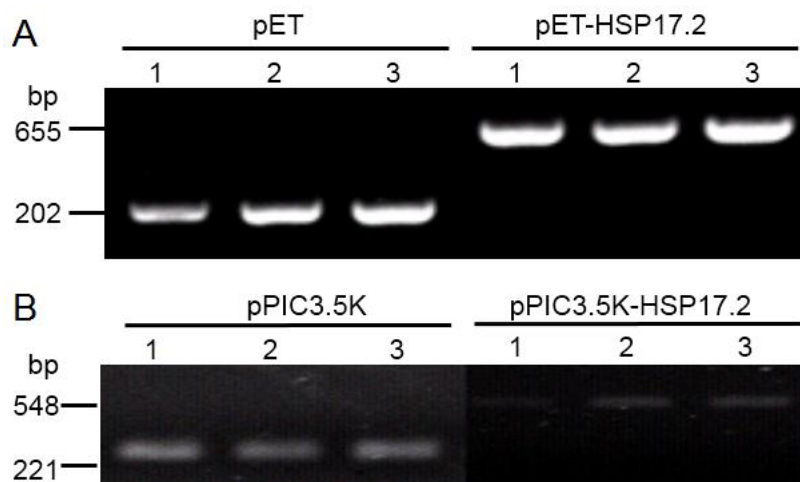

**Figure S2. Confirmation of the positive clones in (a) *E. coli* and (b) *P. pastoris*.** pET and pPIC3.5K indicate two different empty vectors in *E. coli* and *P. pastoris*, respectively, while

pET-HSP17.2 and pPIC3.5K-HSP17.2 are the corresponding recombinant plasmids. 1, 2, and 3: three independent transformants.

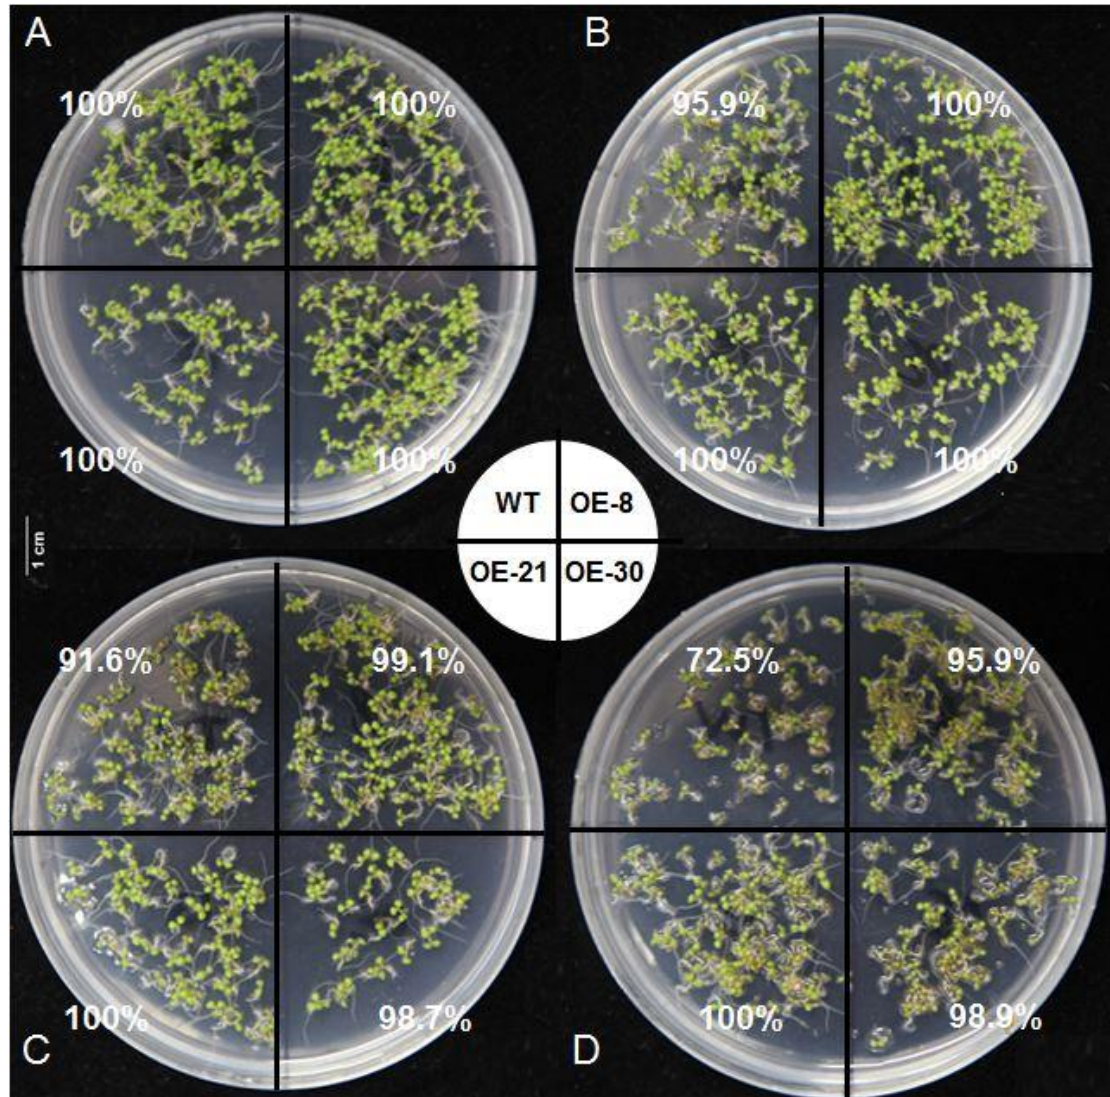

**Figure S3.** The germination performance of *A. thaliana* seeds under HS (45 °C). (a) The control group untreated with HS. (b) HS for 1 h. (c) HS for 2 h. (d) HS for 3 h. WT: wild-type. OE-8, OE-21, and OE-30: transgenic *A. thaliana* lines. Scale bar = 1 cm.



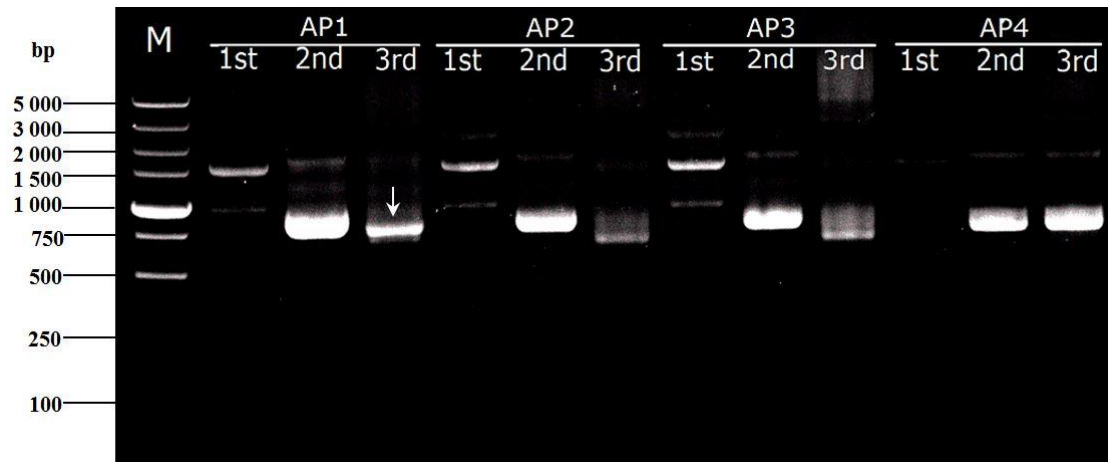

**Figure S4. Isolation of *CsHSP17.2* promoter by thermal asymmetric interlaced PCR (TAIL-PCR).** *M*, DL5000 DNA marker. *AP1*, *AP2*, *AP3*, and *AP4*: the degenerate primers provided by Genome Walking Kit (TaKaRa, Dalian, China). *1st*, *2nd*, and *3rd*: the PCR products of the primary, secondary, and tertiary reactions, respectively. The target fragment was indicated by *white arrow*.

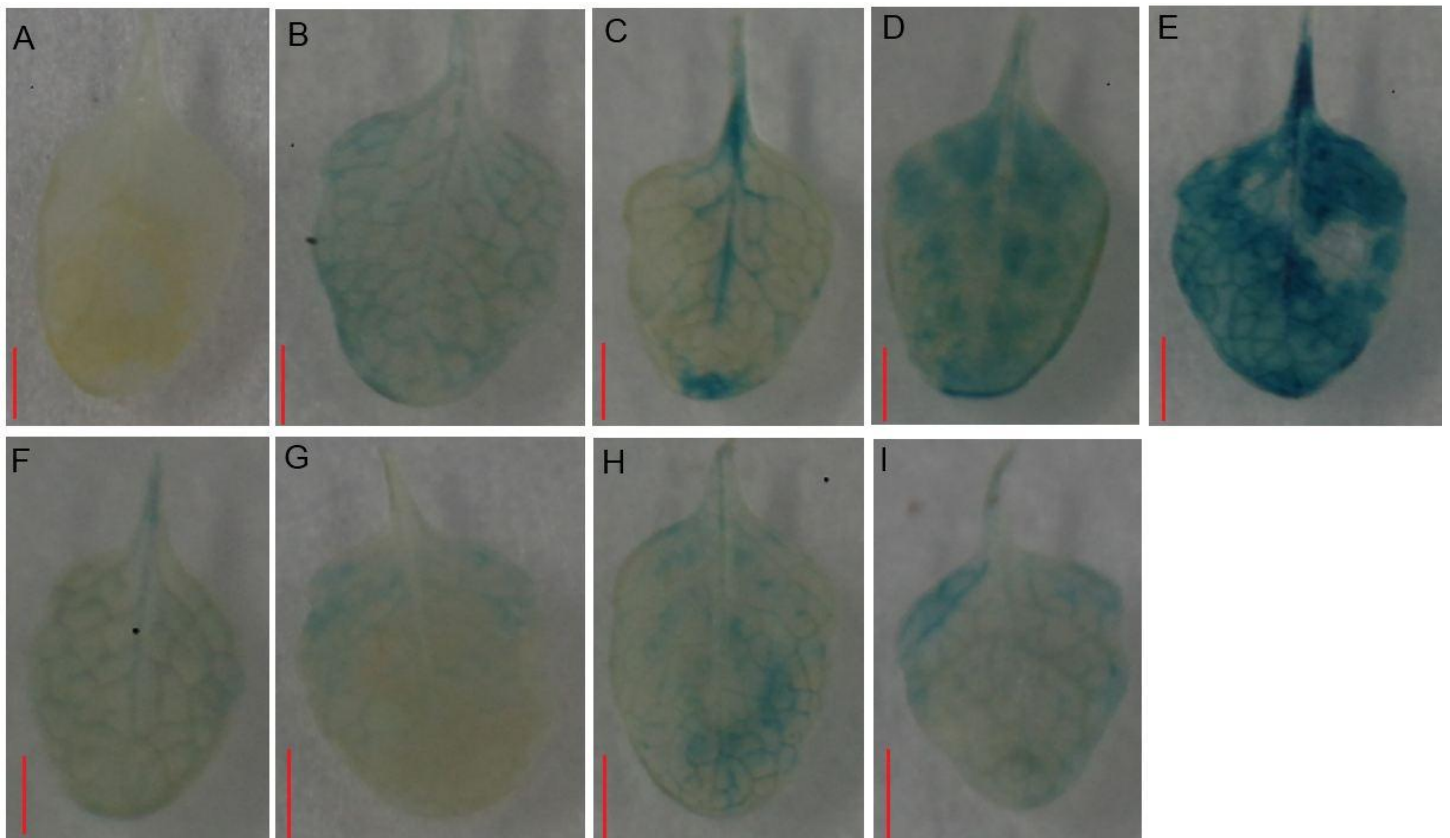

**Figure S5. GUS histochemical assay under abiotic stresses and hormones.** GUS accumulation under heat stress for (a) 0 h, (b) 1 h, (c) 6 h, (d) 12 h, and (e) 24 h. GUS accumulation under (f) anaerobic treatment, (g) PEG6000, (h) MeJA, and (i) GA3. *Scale bar* = 1 cm.

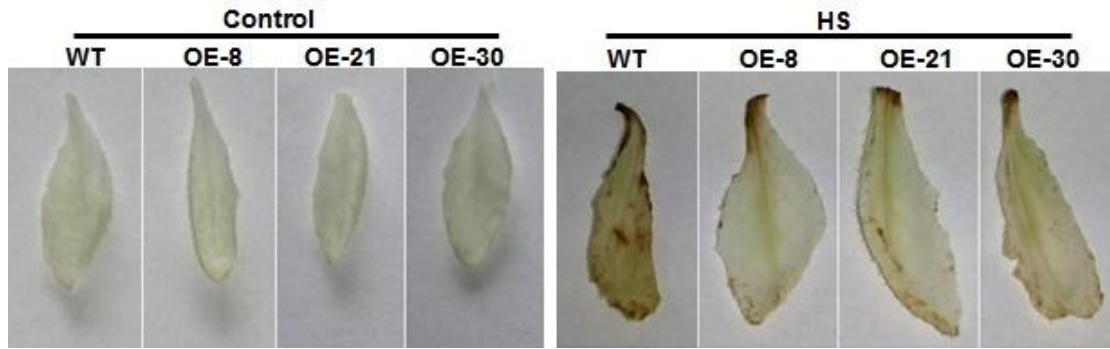

**Figure S6. Histochemical detection of H<sub>2</sub>O<sub>2</sub> with diaminobenzidine (DAB) staining in WT and transgenic *A. thaliana* rosette leaves under HS (45 °C for 4 h). WT: wild-type. OE-8, OE-21, and OE-30: transgenic *A. thaliana* plants.**

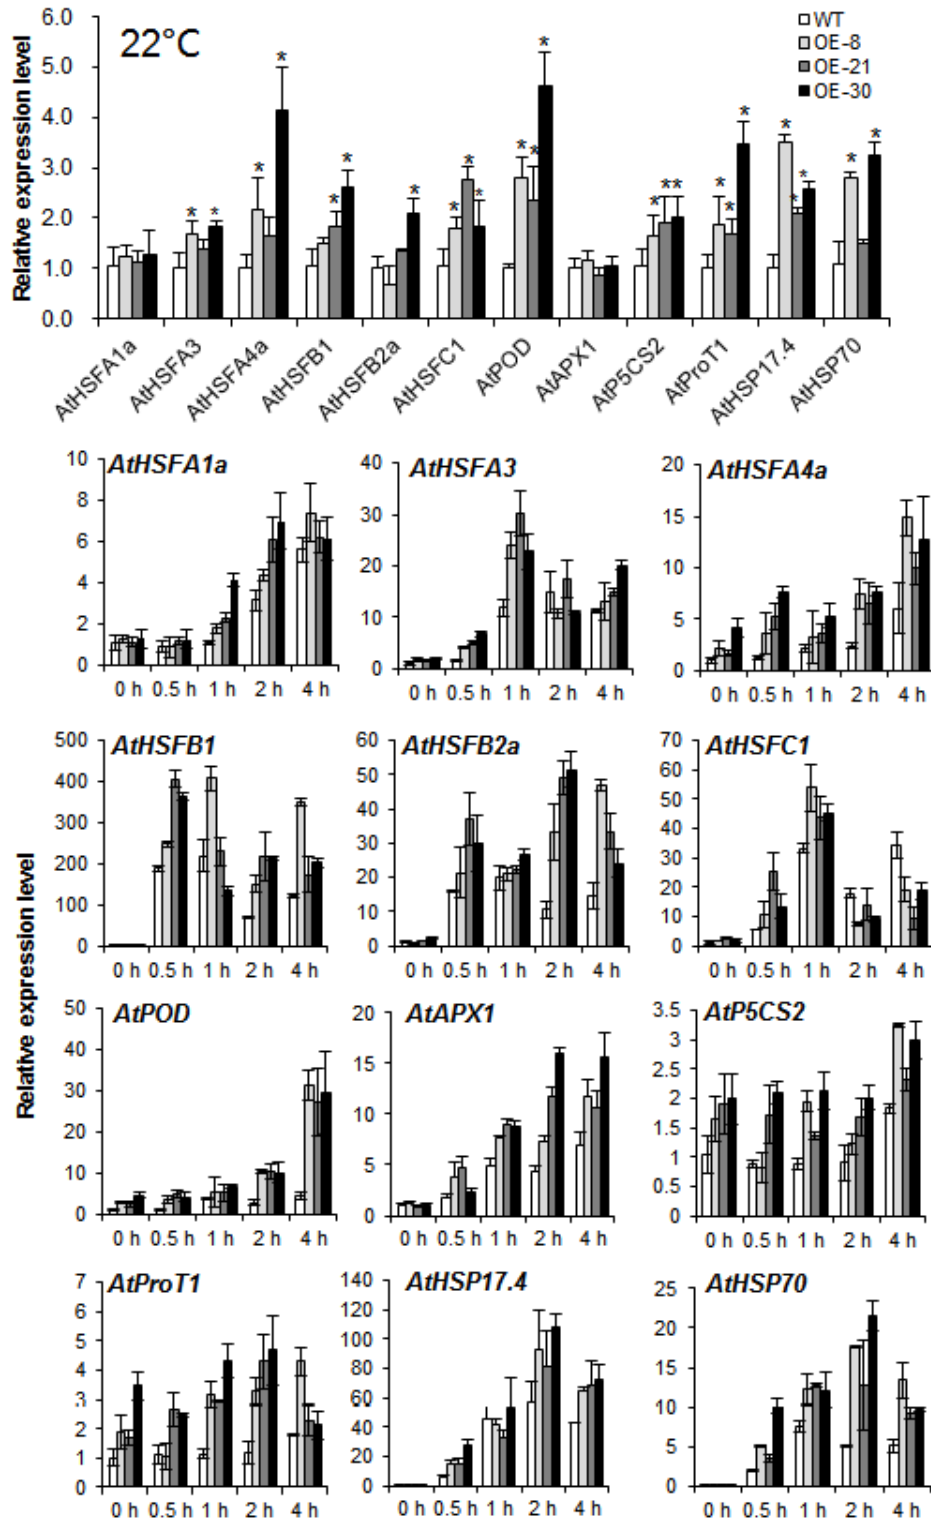

**Figure S7.** Expression analysis of HS-responsive genes in WT and transgenic *A. thaliana* plants. Data are the means  $\pm$  standard deviations of three independent experiments. Significant differences between WT and transgenic *A. thaliana* plants are indicated by asterisks (\* $P < 0.05$ ).

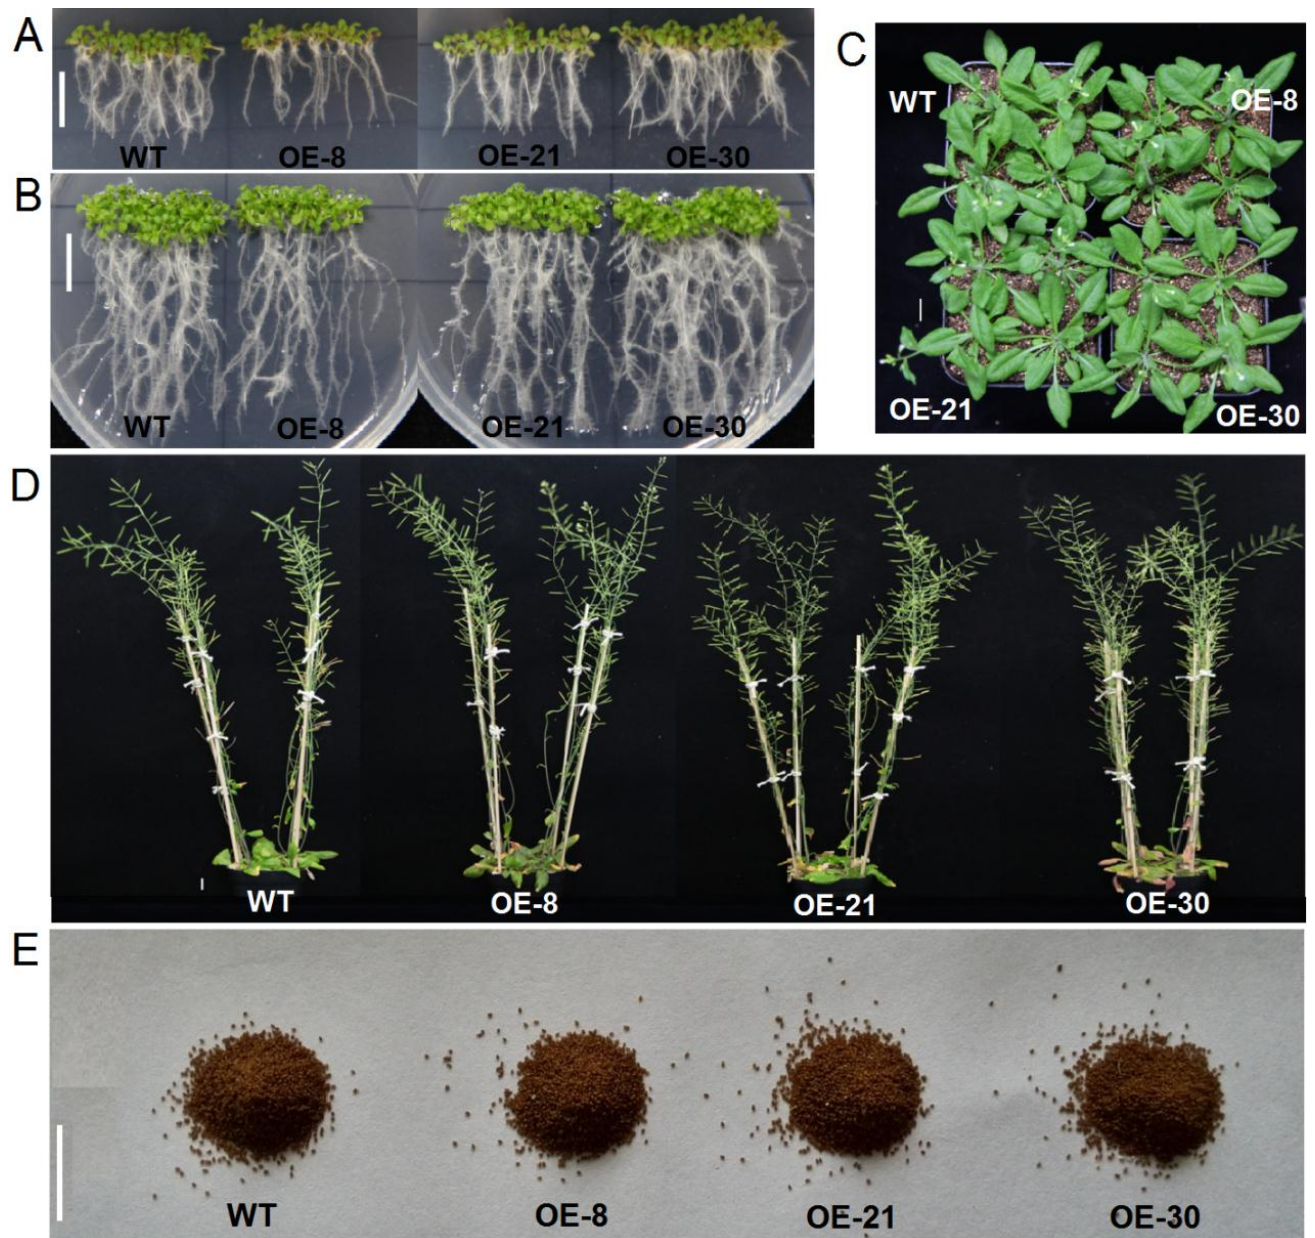

**Figure S8. Phenotypes of *A. thaliana* under normal conditions.** (a) 1-week-old and (b) 2-week-old plants grown on 1/2 MS medium. (c) 5-week-old and (d) 7-week-old seedlings cultivated in soil. (e) Seed yields per plant. *Scale bar* = 1 cm.



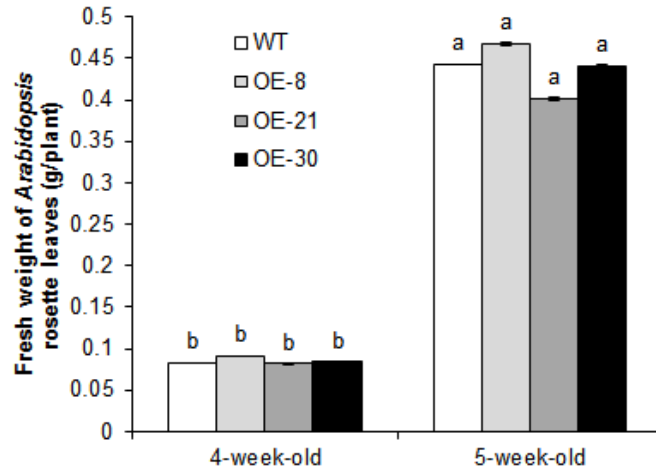

**Figure S9.** Fresh weights of *A. thaliana* rosette leaves (g/plant). The values are from four replicates of 40 seedlings (means  $\pm$  standard deviations). Significant differences between WT and transgenic *A. thaliana* plants are indicated by different letters ( $P < 0.05$ ).

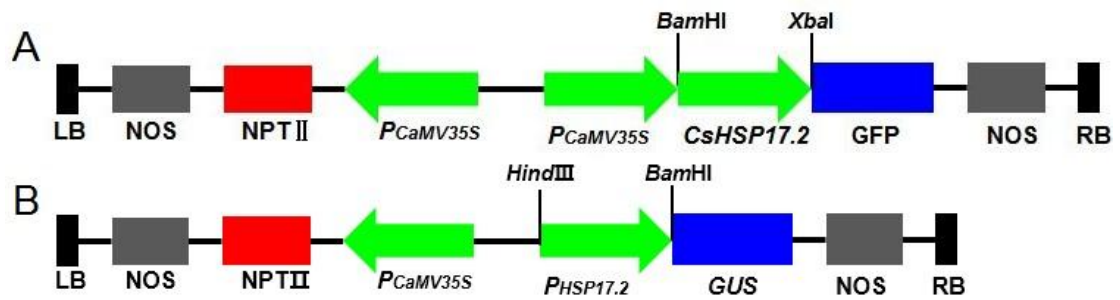

**Figure S10.** Structure of the  $35S::CsHSP17.2::GFP$  (a) and  $PHSP17.2::GUS$  (b) recombinant vector used for *A. thaliana* transformations.

**Table S1. Description of some *cis*-acting elements found in the *CsHSP17.2* promoter using the PlantCARE database.**

| <b>Motif name</b>                    | <b>Sequence</b>                  | <b>Description</b>                                                                                           |
|--------------------------------------|----------------------------------|--------------------------------------------------------------------------------------------------------------|
| TATA-box                             | TAATA<br>GCTATAAATA              | core promoter element around -30 of transcription start                                                      |
| HSE<br>(Heat Shock Element)          | AGAAAGTTTCG                      | <i>cis</i> -acting element involved in heat stress responsiveness                                            |
| ARE<br>(Anaerobic Response Element)  | AAACCA                           | <i>cis</i> -acting regulatory element essential for the anaerobic induction                                  |
| MBS<br>(MYB Binding Site)            | CAGTTG                           | MYB binding site involved in drought-inducibility                                                            |
| TC-rich repeats                      | ATTTACTCCA                       | <i>cis</i> -acting element involved in defense and stress responsiveness                                     |
| GCN4_motif                           | TGACACA                          | <i>cis</i> -regulatory element involved in endosperm expression                                              |
| O2-site                              | GATGATATGA                       | <i>cis</i> -acting regulatory element involved in zein metabolism regulation                                 |
| Skn-1_motif                          | GTCAT                            | <i>cis</i> -acting regulatory element required for endosperm expression                                      |
| CGTCA-motif                          | CGTCA                            | <i>cis</i> -acting regulatory element involved in the MeJA-responsiveness                                    |
| ERE<br>(Ethylene-Responsive Element) | TTTGAAA                          | ethylene-responsive element probably involved in petal senescence                                            |
| GARE-motif<br>P-box<br>rGTbcS-CMA7a  | TCTGTTG<br>CAAAAGG<br>GTCGATAAGC | gibberellin-responsive element<br><br><i>cis</i> -acting regulatory element involved in light responsiveness |
| G-box<br>CCAAT box                   | CACGTC<br>CCAAT<br>ATTGG         | heat shock-related element                                                                                   |
| AGGGG motif                          | AGGGG                            | stress responsive element                                                                                    |

**Table S2. Primers used in this study.**

| Primer name      | Sequences (5'-3')                       | Annotation                                                     |
|------------------|-----------------------------------------|----------------------------------------------------------------|
| ORF-F            | ATGTCGATGATCCCAAGCTTCTTCGGC             | ORF cloning                                                    |
| ORF-R            | CTAACCAGAGATATCAATAGACTTGAT             |                                                                |
| CsHSP17.2-qF     | CCCTTCAGAAACTCTCCCTTC                   | qRT-PCR of <i>CsHSP17.2</i>                                    |
| CsHSP17.2-qR     | AACCCTGTGCCAAGTATCGT                    |                                                                |
| $\beta$ -actin-F | GCCATCTTTGATTGGAATGG                    | Reference gene of <i>C. sinensis</i>                           |
| $\beta$ -actin-R | GGTGCCACAACCTTGATCTT                    |                                                                |
| sub-F            | <u>CGGGATCC</u> ATGTTCGATGATCCCAAGCTTC  | Subcellular localization and <i>A. thaliana</i> transformation |
| sub-R            | GCTCTAGAACCAGAGATATCAATAGACTTG          |                                                                |
| pro-F            | <u>CGGGATCC</u> ATGTTCGATGATCCCAAGCTTC  | Overexpression in <i>E. coli</i> and <i>P. pastoris</i>        |
| pro-R            | <u>CGGAATTC</u> TAACCAGAGATATCAATAGA    |                                                                |
| S.tag            | CGAACGCCAGCACATGGACA                    | Universal primers for pET-32a (+) vector                       |
| T7-Ter           | GCTAGTTATTGCTCAGCGG                     |                                                                |
| 5'AOX1           | GACTGGTTCCAATTGACAAGC                   | Universal primers for pPIC3.5K vector                          |
| 3'AOX1           | GCAAATGGCATTCTGACATCC                   |                                                                |
| SP1              | CCCTGTGCCAAGTATCGTTCTTCTCCT             | Promoter cloning                                               |
| SP2              | GGGAGAGTTTCTGAAGGGGTCAAGAGAG            |                                                                |
| SP3              | AGGACTCTGTTTGGATACGGAGAA                |                                                                |
| pHSP17.2-F       | CCCA <u>AAGCTT</u> CCTTCTCGAGTATGGTGTGG | Construction of <i>PHSP17.2:GUS</i> fusion vector              |
| pHSP17.2-R       | <u>CGGGATCC</u> GATATGCGATCGGAATTCAAGG  |                                                                |
| T-pHSP17.2-F     | TAGAGCAATCAGGGAGGGTAAGC                 | Confirmation of transformants with <i>PHSP17.2:GUS</i>         |
| T-pHSP17.2-R     | ACACGGAAATGTTCTGCGACGAG                 |                                                                |
| GUS-qF           | AGAGCTGATAGCGGTGACAAAAAC                | qRT-PCR of <i>GUS</i> gene                                     |
| GUS-qR           | TGTGAGCGTCGCAGAACATTACATT               |                                                                |

Note: the underlines indicated the restriction sites.

**Table S3. Primers used for qRT-PCR in transgenic *A. thaliana* overexpressing *CsHSP17.2*.**

| Gene name        | Gene AGI No. | Primer name | Sequences (5'-3')                 |
|------------------|--------------|-------------|-----------------------------------|
| <i>AtAPX1</i>    | AT1G07890    | F           | CCTGATGCTACCAAGGGTTGT             |
|                  |              | R           | GACCTATCCTTGTGGCATCGTC            |
| <i>AtPOD</i>     | AT3G49120    | F           | CCAAACTCTTCGTGGACTATGC            |
|                  |              | R           | AACTCTTGGTCGCTCTGGAT              |
| <i>AtP5CS2</i>   | AT3G55610    | F           | GGGACAAGTTGTGGATGGAGAC            |
|                  |              | R           | TGGTACAAACCTCAAGGAACAC            |
| <i>AtProT1</i>   | AT2G39890    | F           | TTTAGTTTGATGTCTGTTGCTGC           |
|                  |              | R           | AGAAATAAACCTGCCTAAGAATA           |
| <i>AtHsp18.2</i> | AT5G59720    | F           | AGCAACGAACAATGTCTCTCATTCCAAGC     |
|                  |              | R           | AACCTTGACTTCTTCTTCTTCAGGCCTG      |
| <i>AtHSP70</i>   | AT3G12580    | F           | GTCGAAATCATCGCCAACG               |
|                  |              | R           | CGACTTGATTCTTGGCAGCA              |
| <i>AtACTIN2</i>  | AT3G18780    | F           | CTCCCGCTATGTATGTCGCC              |
|                  |              | R           | TTGGCACAGTGTGAGACACAC             |
| <i>AtHSFA1a</i>  | AT4G17750    | F           | AATGCCAGAGACTTCCCAGAT             |
|                  |              | R           | AATGGGCTTGGAGAGATGAAT             |
| <i>AtHSFA3</i>   | AT5G03720    | F           | CTTGGGGACTGACCGGAGCTAGCTTCGTAG    |
|                  |              | R           | GCTAGTGCTACTGCAGCAAGTTTGGTTG      |
| <i>AtHSFA4a</i>  | AT4G18880    | F           | ATGATTCCTTCATCCGATTCTATCGTCTCTTGG |
|                  |              | R           | TCATCATTCGCAAATTCCCATTGCTCAGG     |
| <i>AtHSFB1</i>   | AT4G36990    | F           | GGACCGGGATGAAAAGAATTA             |
|                  |              | R           | CACGCTGGTTTGAACAGTCTT             |
| <i>AtHSFB2a</i>  | AT5G62020    | F           | GACGCATCAAACAGTTGTTGCTCCTTCGTC    |
|                  |              | R           | TCAGTGGGCTGAGATCCGACGTAATTCGAC    |
| <i>AtHSFC1</i>   | AT3G24520    | F           | CTTCTCGCAACGAATCTTACCTGCTTATTC    |
|                  |              | R           | CTTGACCGTACATCCCCCGCGCGTGTTC      |
